# Supplementary material for: Genealogical inference and more flexible sequence clustering using iterative-PopPUNK
Source: HighWire-hosted journal article supplement (doi:10.1101/gr.277395.122), 2023-05-30
Supplement: Supplemental_Materials.zip [file Supplemental_Fig_S1.pdf › Supplemental_Materials/Supplemental_Fig_S1.pdf]

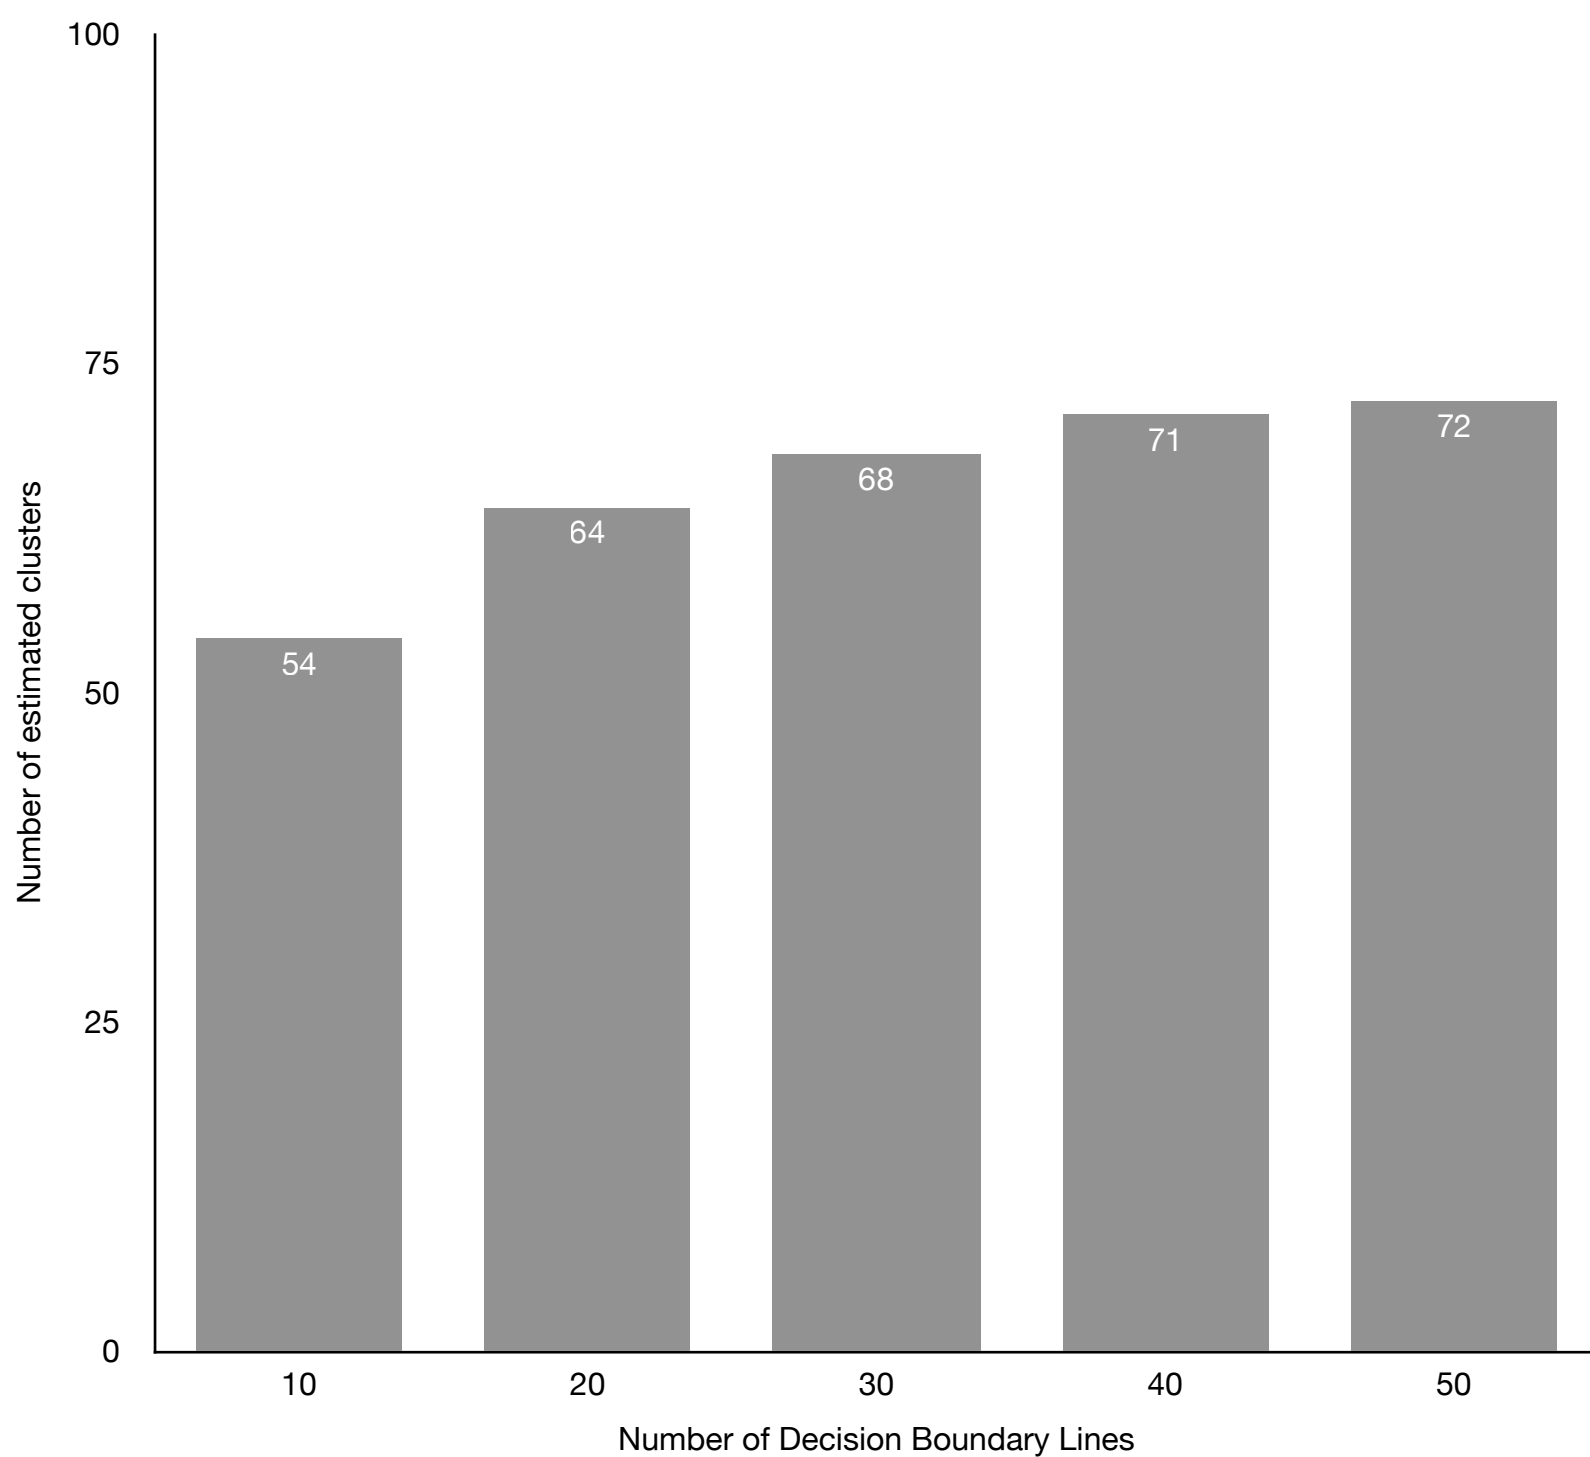

Supplemental Fig S1: The relationship between the number of decision boundary lines and estimated clusters. In this plot, the average number of estimated clusters were generated from 150 randomly selected sets of simulation genomes.
