# Supplementary material for: Genealogical inference and more flexible sequence clustering using iterative-PopPUNK
Source: HighWire-hosted journal article supplement (doi:10.1101/gr.277395.122), 2023-05-30
Supplement: Supplemental_Materials.zip [file Supplemental_Fig_S2.pdf › Supplemental_Materials/Supplemental_Fig_S2.pdf]

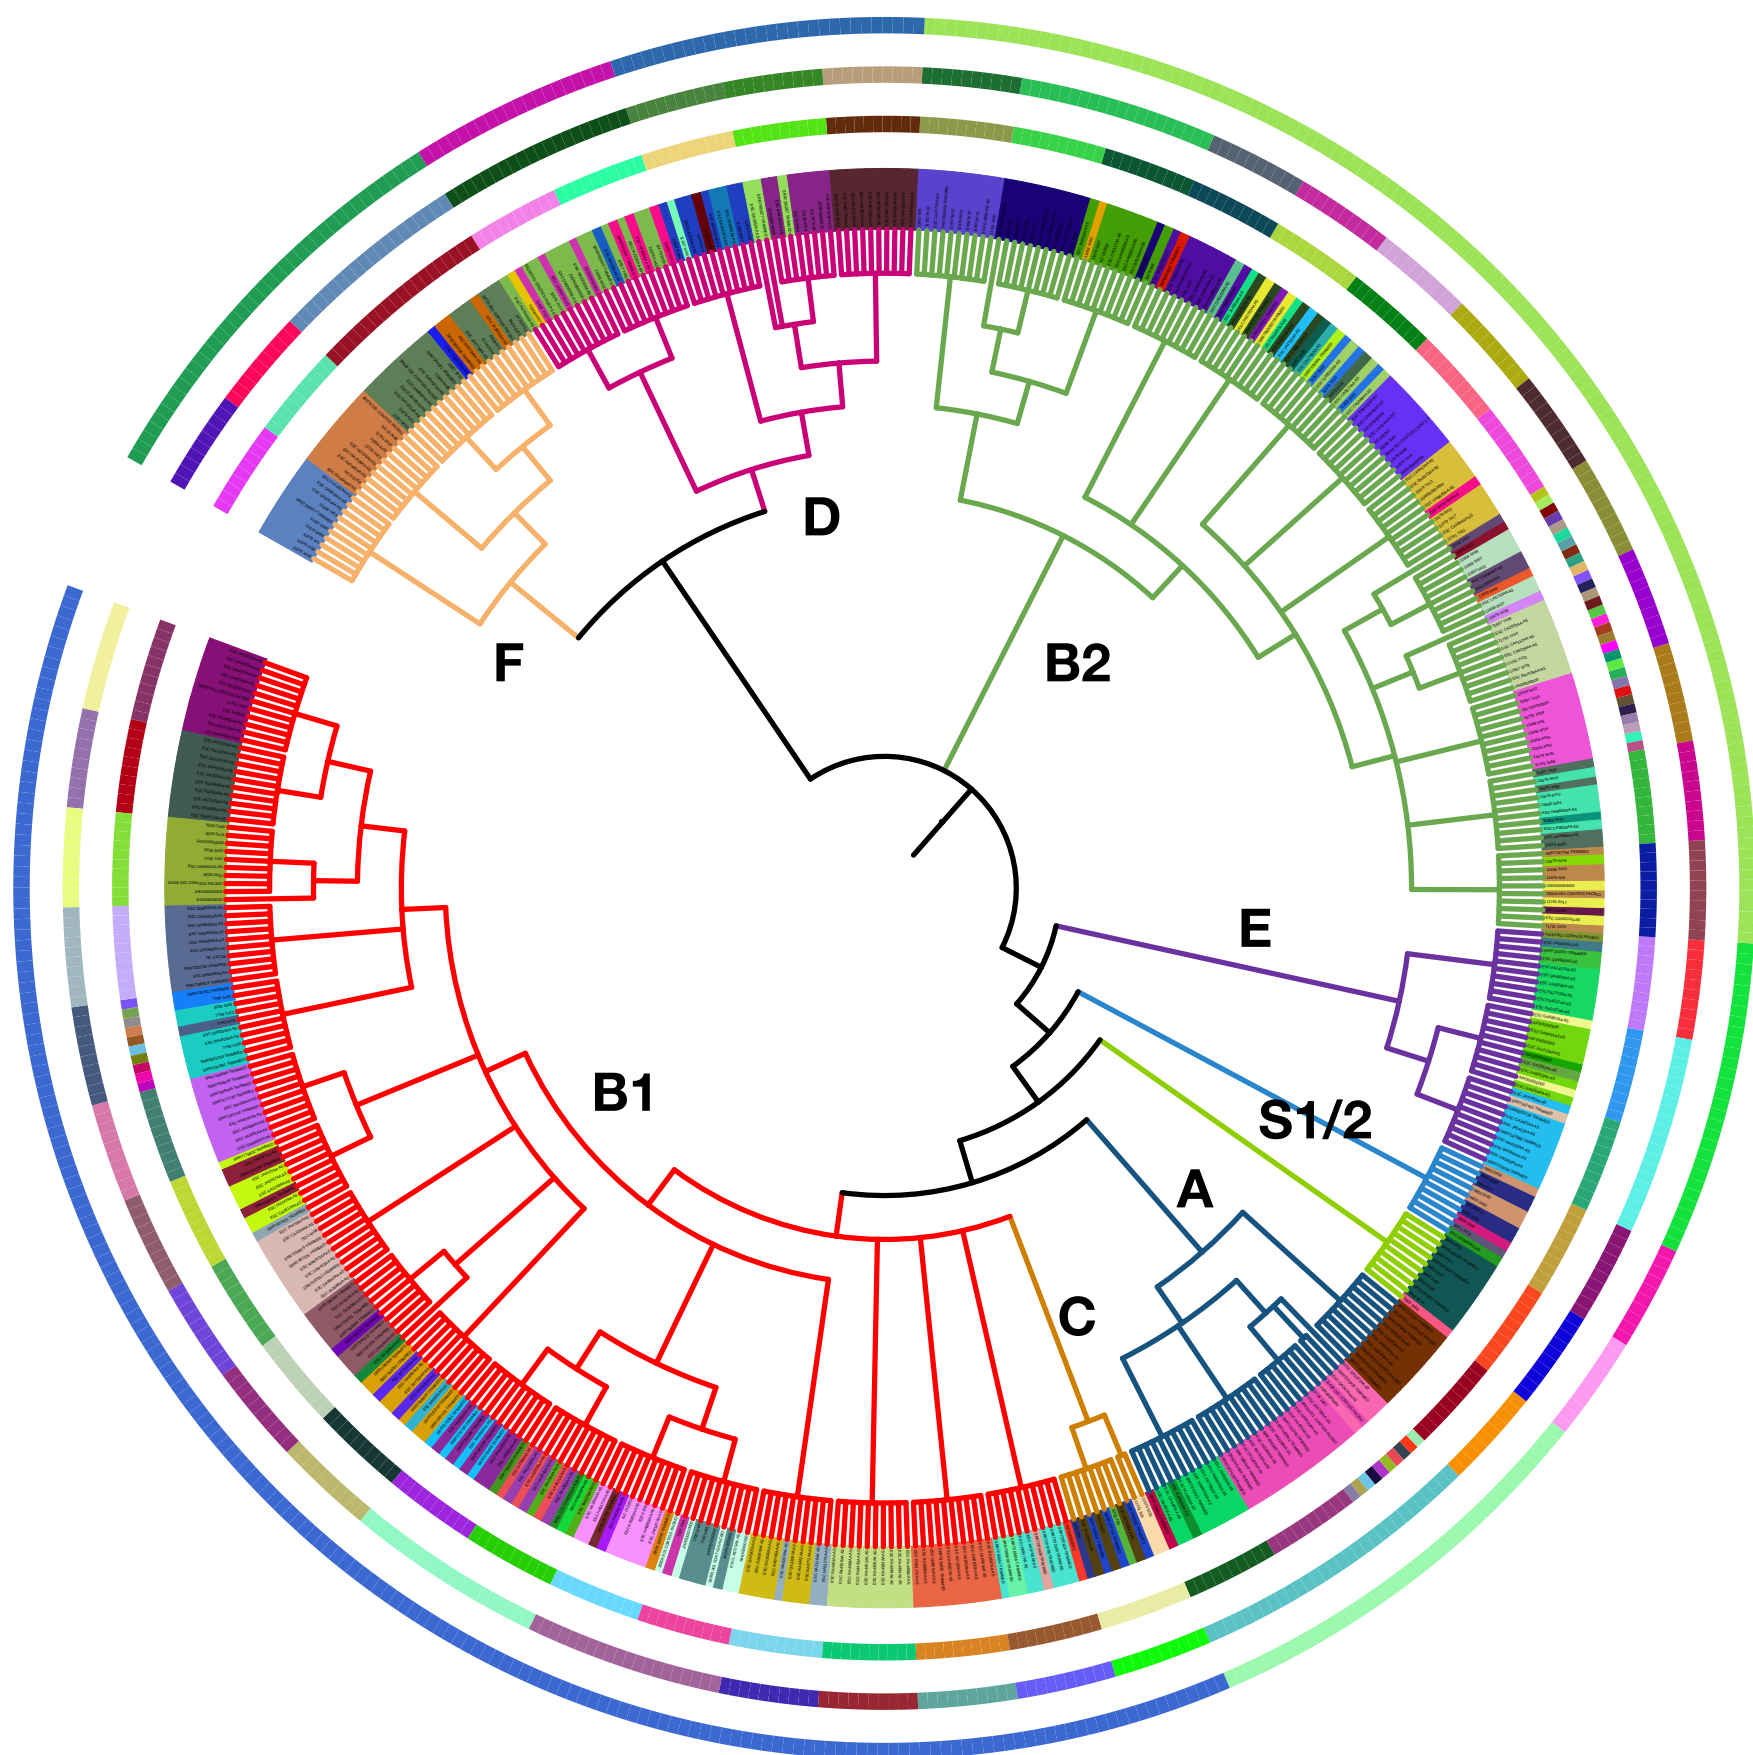

Supplemental Fig S2: Comparison of iterative-PopPUNK tree and PopPUNK clusters. The outer ring represents 9 PopPUNK clusters at 50% of the MACD, corresponding to 9 *E.coli* phylogroups. The middle ring contains 42 clusters at 20% of the MACD, corresponding to 42 clusters from phylogenetical tree at 20% SNP distance. The inner solid ring shows 94 PopPUNK clusters at 7.9% of the MACD, corresponding to 92 *E.coli* STs groups. Colors in the tree leaves and branches are used to present these 92 STs and 9 phylogroups respectively. The parameters used for estimating PopPUNK clusters were all set to default with 2D GMM model (two components) with a “neg-shift” value of -0.25.
