# Supplementary material for: Genealogical inference and more flexible sequence clustering using iterative-PopPUNK
Source: HighWire-hosted journal article supplement (doi:10.1101/gr.277395.122), 2023-05-30
Supplement: Supplemental_Materials.zip [file Supplemental_Fig_S4.pdf › Supplemental_Materials/Supplemental_Fig_S4.pdf]

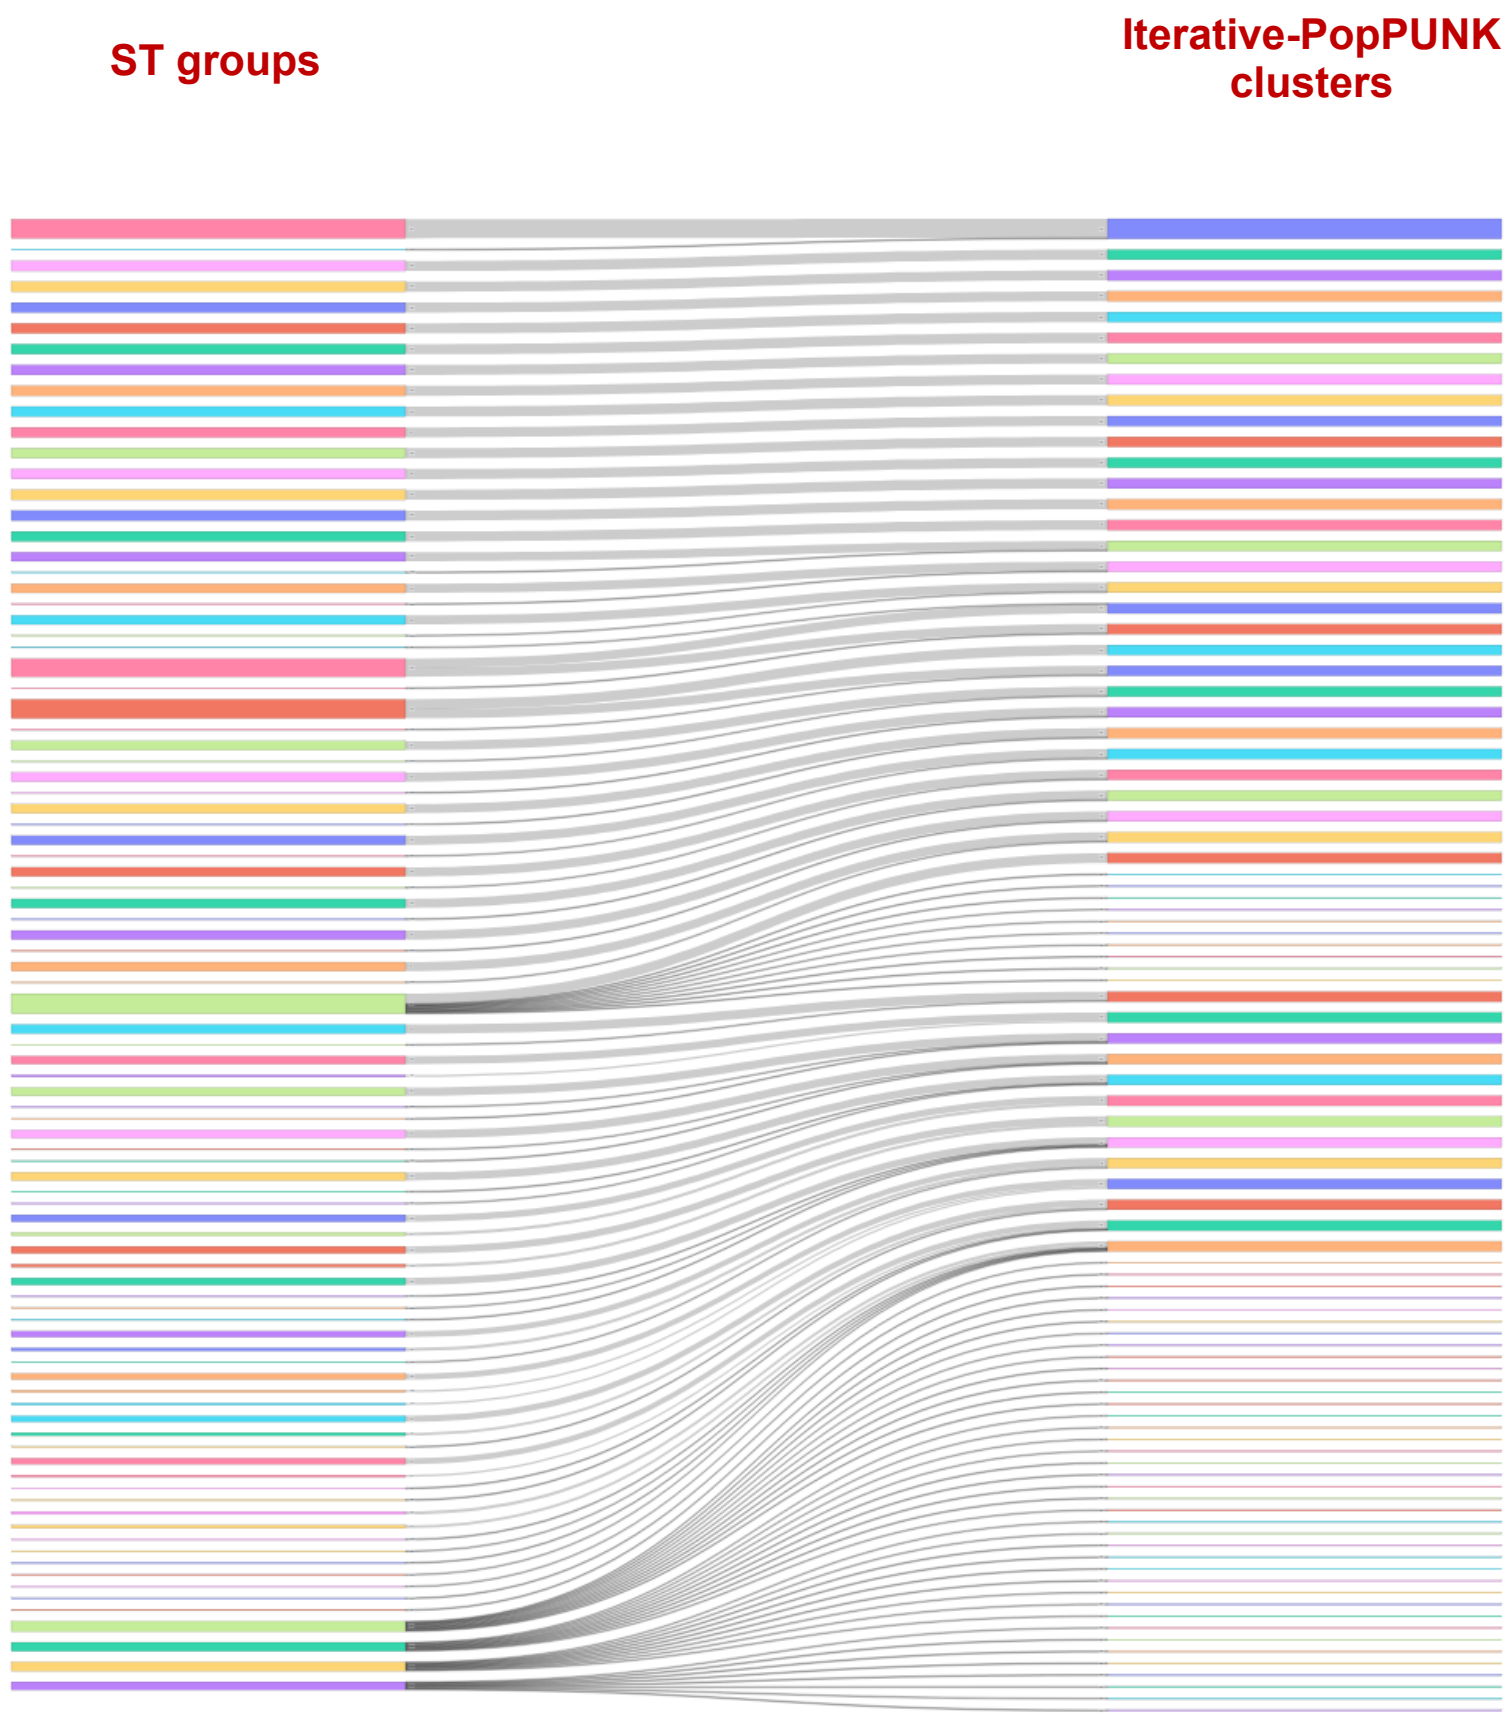

Supplemental Fig S4: The comparison of Sequence Typing (ST) groups and iterative-PopPUNK clusters of 500 representative *E. coli* genomes. The ST groups of these 500 *E. coli* genomes were extracted from Horesh et al. 2021 and the corresponding iterative-PopPUNK cutoff value is 7.9% of MACD.
