# Supplementary material for: Genealogical inference and more flexible sequence clustering using iterative-PopPUNK
Source: HighWire-hosted journal article supplement (doi:10.1101/gr.277395.122), 2023-05-30
Supplement: Supplemental_Materials.zip [file Supplemental_Fig_S6.pdf › Supplemental_Materials/Supplemental_Fig_S6.pdf]

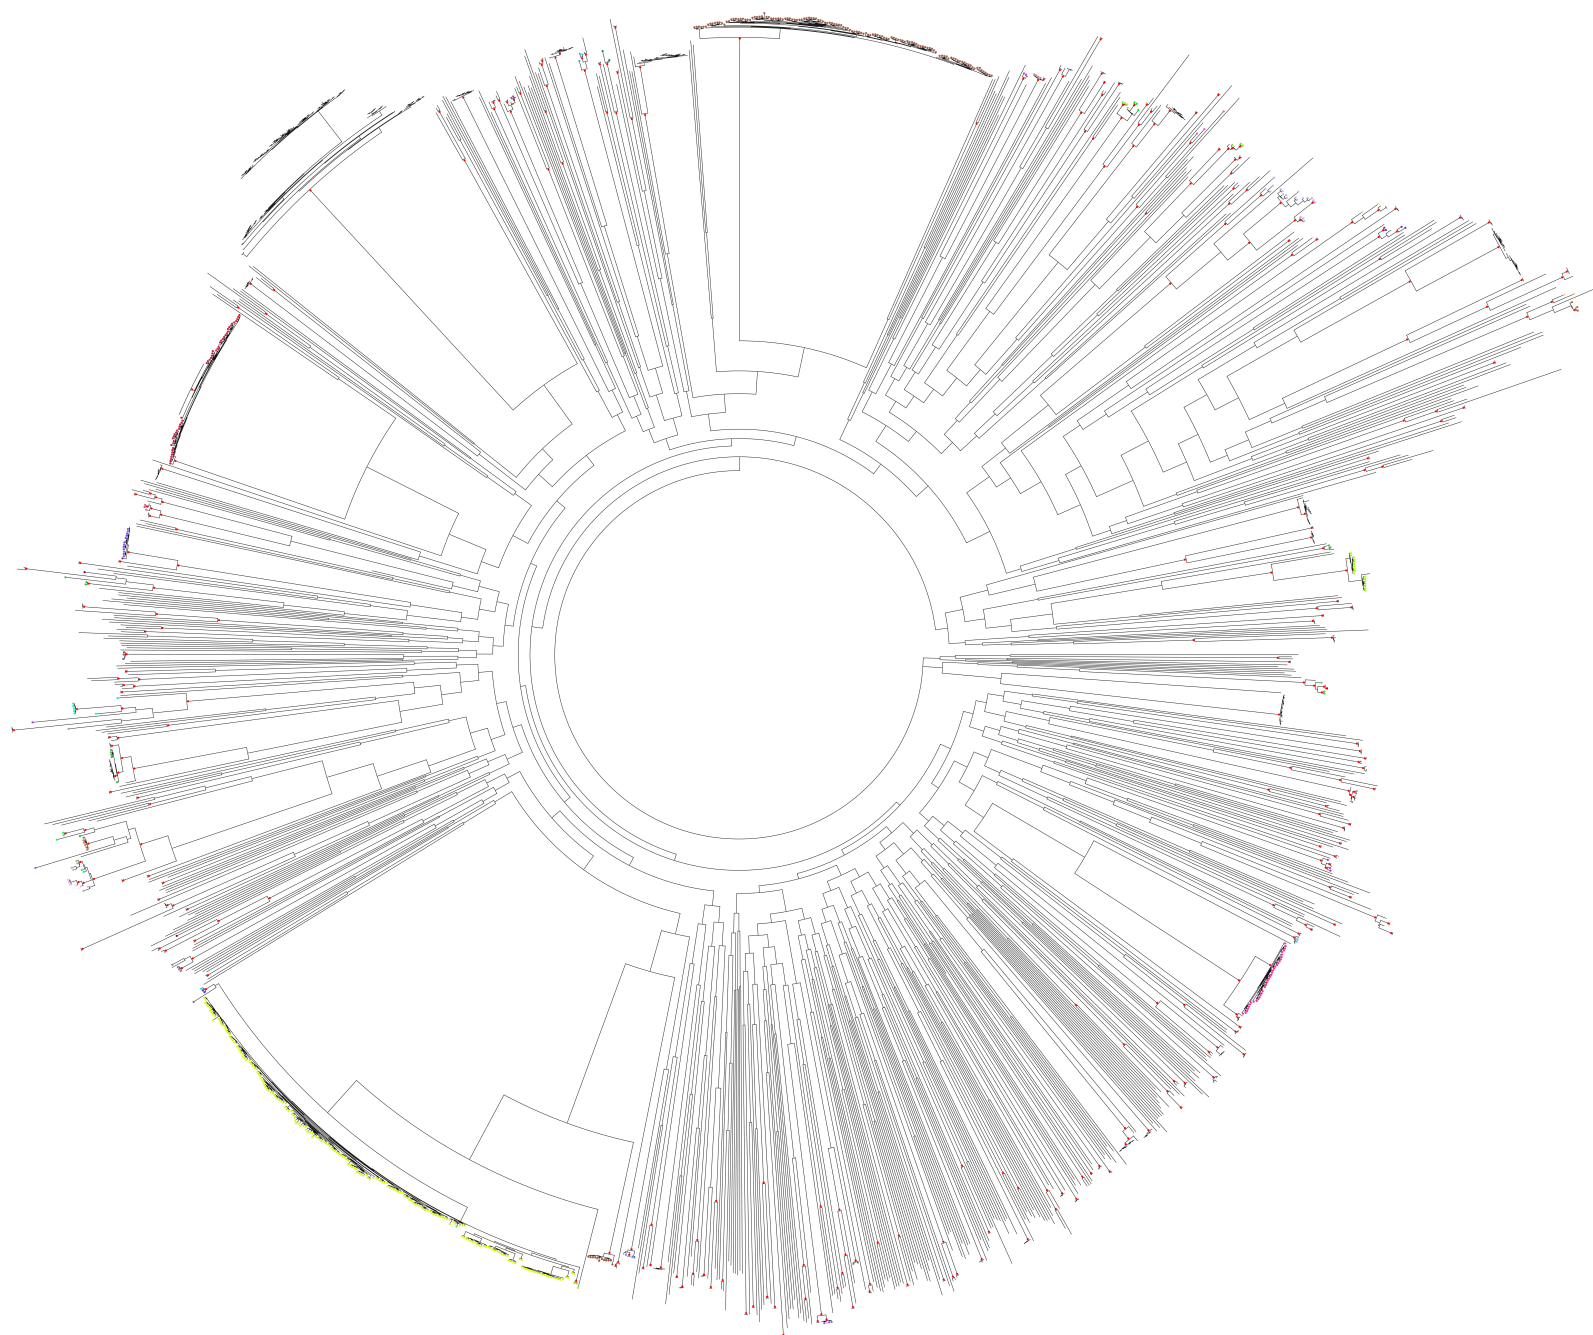

Supplemental Fig S6: The iterative-PopPUNK tree overlaid with and phylogenetic tree of *Vibrio parahaemolyticus*. Nodes of the tree that correspond exactly to an inferred cluster are shown in red. Where an inferred cluster does not correspond to a node in the phylogenetic tree, it is assigned a colour and all the strains in that cluster have their tips labelled using that colour.
